# Supplementary material for: Relationship of Different Anthropometric Indices with Vascular Ageing in an Adult Population without Cardiovascular Disease—EVA Study
Source: MDPI journal article supplement (doi:10.3390/jcm11092671), 2022-05-09
Supplement: s1 [file s1]

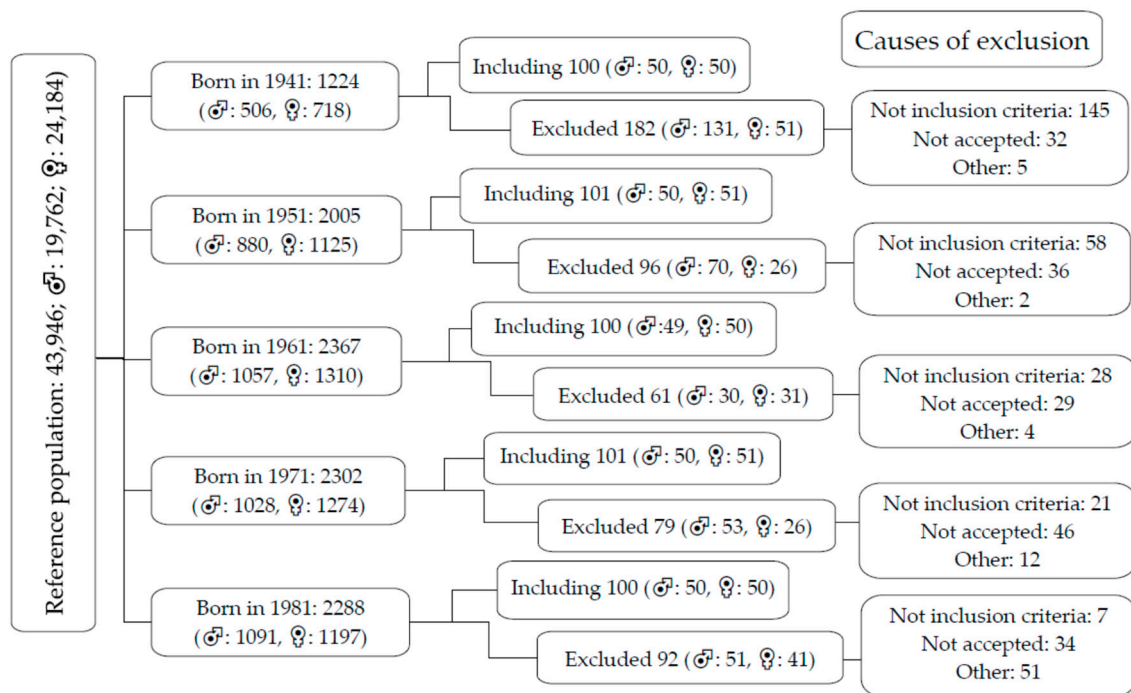

**Figure S1.** Flow diagram describing the reference population (43,946), those included and excluded, as well as exclusion criteria by age group and sex. A total of 259 subjects did not meet the inclusion criteria; 177 did not agree to participate in the study; 74 (other) subjects were not located due to changes in address or telephone number.

**Table S1.** Percentile values of the cf-PWV by age and sex.

| Age in year | 35   | 45   | 55   | 65    | 75    |
|-------------|------|------|------|-------|-------|
| Men 90 th   | 8.00 | 8.40 | 9.20 | 12.70 | 15.80 |
| Men 10 th   | 5.50 | 5.50 | 6.10 | 6.40  | 7.44  |
| Women 90 th | 7.30 | 7.88 | 9.38 | 9.62  | 13.30 |
| Women 10 th | 5.00 | 5.44 | 5.80 | 6.62  | 7.40  |

cf-PWV, carotid-femoral aortic pulse wave velocity.

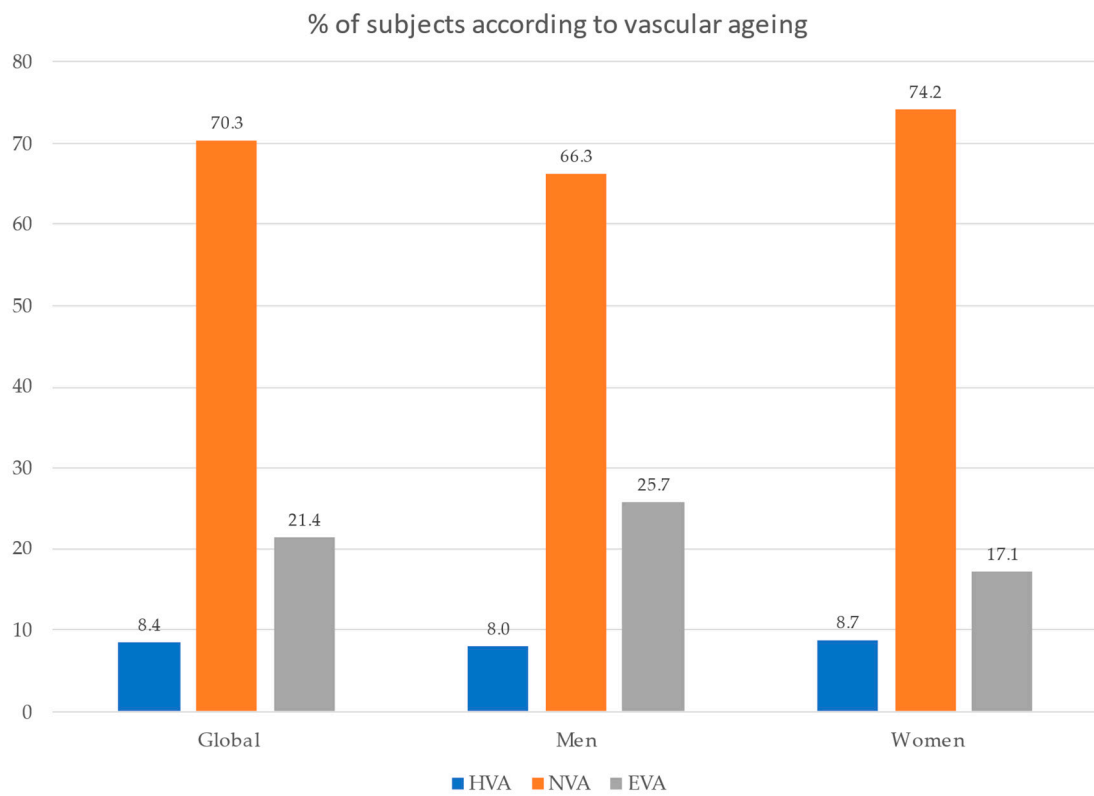

**Figure S2.** % Vascular ageing status global and by sex. EVA early vascular ageing, HVA healthy vascular ageing, NVA normal vascular ageing.

**Table S2.** Relationship between the anthropometric parameters with cf-PWV. Multiple regression analysis.

| Model 1                       | B (95% CI)             | P value |
|-------------------------------|------------------------|---------|
| <b>BMI (kg/m<sup>2</sup>)</b> | 0.137 (0.085 – 0.189)  | <0.001  |
| WC (cm)                       | 0.076 (0.058 – 0.093)  | <0.001  |
| HC (cm)                       | 0.022 (-0.002 – 0.047) | 0.076   |
| WHtR                          | 0.014 (0.012 – 0.017)  | <0.001  |
| WHR                           | 5.970 (4.208 – 7.734)  | <0.001  |
| BAI (%)                       | 0.059 (0.022 – 0.096)  | 0.002   |
| VAI (cm <sup>2</sup> )        | 0.196 (0.103 – 0.288)  | <0.001  |
| BRI                           | 0.674 (0.543 – 0.805)  | <0.001  |
| CUNBAE                        | 0.057 (0.029 – 0.085)  | <0.001  |
| AVI                           | 0.208 (0.161 – 0.256)  | <0.001  |
| SATA                          | 0.006 (0.004 – 0.008)  | <0.001  |
| IMP                           | 0.032 (0.021 – 0.044)  | <0.001  |
| Model 2                       |                        |         |
| BMI (kg/m <sup>2</sup> )      | 0.063 (0.022 – 0.103)  | 0.002   |
| WC (cm)                       | 0.036 (0.020 – 0.052)  | <0.001  |
| HC (cm)                       | 0.026 (0.008 – 0.044)  | 0.004   |
| WHtR                          | 0.005 (0.002 – 0.008)  | <0.001  |
| WHR                           | 0.958 (-0.707 – 2.622) | 0.259   |
| BAI (%)                       | 0.032 (-0.002 – 0.066) | 0.064   |
| VAI (cm <sup>2</sup> )        | 0.118 (0.049 – 0.187)  | 0.001   |
| BRI                           | 0.251 (0.133 – 0.369)  | <0.001  |
| CUNBAE                        | 0.048 (0.015 – 0.081)  | 0.005   |
| AVI                           | 0.101 (0.058 – 0.144)  | <0.001  |
| SATA                          | 0.003 (0.001 – 0.004)  | 0.002   |
| IMP                           | 0.013 (0.004 – 0.022)  | 0.006   |
| Model 3                       |                        |         |
| BMI (kg/m <sup>2</sup> )      | 0.043 (0.004 – 0.081)  | 0.032   |
| WC (cm)                       | 0.027 (0.012 – 0.043)  | 0.001   |
| HC (cm)                       | 0.021 (0.004 – 0.038)  | 0.018   |
| WHtR                          | 0.003 (0.001 – 0.006)  | 0.006   |
| WHR                           | 0.606 (-0.956 – 2.169) | 0.446   |
| BAI (%)                       | 0.606 (-0.956 – 2.169) | 0.446   |
| VAI (cm <sup>2</sup> )        | 0.018 (-0.015 – 0.050) | 0.285   |
| BRI                           | 0.098 (0.024 – 0.172)  | 0.010   |
| CUNBAE                        | 0.174 (0.059 – 0.288)  | 0.003   |
| AVI                           | 0.033 (0.002 – 0.065)  | 0.040   |
| SATA                          | 0.078 (0.037 – 0.119)  | <0.001  |
| IMP                           | 0.002 (0.001 – 0.004)  | 0.032   |

Multiple regression analysis using cf-PWV dependent variables, anthropometric indices as independent variable. Model 1 unadjusted. Model 2 adjusted by age in years, sex (Male = 1 and female = 0). Model 3 adjusted by age in years, sex CVRF (dyslipidemia, tobacco use, hypertension and diabetes mellitus type 2) and IV (0 = absence, 1 = presence). CVRF, cardiovascular risk factors; IV, vascular injury; BMI, Body mass index; WC, Waist circumference; HC, Hip circumference; WHtR, waist-to-height ratio; WHR, waist-to-hip ratio; BAI, body adiposity index; VAI, Visceral adiposity index; BRI, body roundness index; AVI, Abdominal Volume Index; CUNBAE, Clinica Universidad de Navarra body adiposity estimator; SATA, Subcutaneous Adipose Tissue Area; IMP, Ideal Mass Percentage.

**Table S3.** AUCs, optimal cut-off, sensitivity, specificity, for the anthropometric indices in ROC analysis for predicting healthy vascular ageing.

| Anthropometric Indices | AUC (95% CI)     | p      | Cut-off | Sensitivity | Specificity | Youden Index |
|------------------------|------------------|--------|---------|-------------|-------------|--------------|
| <b>Global</b>          |                  |        |         |             |             |              |
| BMI                    | 0.72 (0.65-0.80) | <0.001 | 24      | 0.74        | 0.60        | 0.34         |
| SATA                   | 0.72 (0.66-0.80) | <0.001 | 229     | 0.74        | 0.60        | 0.34         |
| IMP                    | 0.72 (0.64-0.80) | <0.001 | 103     | 0.71        | 0.69        | 0.40         |
| WHtR                   | 0.67 (0.60-0.75) | <0.001 | 0.54    | 0.66        | 0.63        | 0.29         |
| BRI                    | 0.67 (0.60-0.75) | <0.001 | 4       | 0.66        | 0.63        | 0.29         |
| BAI                    | 0.63 (0.55-0.71) | 0.006  | 29      | 0.60        | 0.65        | 0.25         |
| WC                     | 0.67 (0.60-0.74) | <0.001 | 90      | 0.60        | 0.60        | 0.20         |
| AVI                    | 0.67 (0.53-0.74) | <0.001 | 16      | 0.61        | 0.60        | 0.21         |
| HC                     | 0.66 (0.58-0.75) | <0.001 | 100     | 0.63        | 0.67        | 0.30         |
| CUNBAE'                | 0.65 (0.57-0.74) | 0.001  | 28      | 0.75        | 0.52        | 0.27         |
| VAI                    | 0.61 (0.53-0.69) | 0.018  | 9       | 0.61        | 0.62        | 0.22         |
| WHR                    | 0.60 (0.53-0.68) | 0.025  | 89      | 0.58        | 0.60        | 0.18         |
| <b>Men</b>             |                  |        |         |             |             |              |
| BMI                    | 0.71 (0.60-0.82) | 0.002  | 25      | 0.72        | 0.70        | 0.42         |
| SATA                   | 0.71 (0.64-0.84) | 0.002  |         | 253         | 0.71        | 0.70         |
| IMP                    | 0.71 (0.59-0.82) | 0.002  | 105     | 0.66        | 0.75        | 0.41         |
| WHtR                   | 0.69 (0.60-0.78) | 0.005  | 0.56    | 0.60        | 0.75        | 0.35         |
| BRI                    | 0.69 (0.60-0.78) | 0.005  | 4.5     | 0.60        | 0.75        | 0.35         |
| BAI                    | 0.59 (0.46-0.71) | 0.206  | 27      | 0.61        | 0.60        | 0.21         |
| WC                     | 0.73 (0.64-0.81) | 0.001  | 96      | 0.62        | 0.80        | 0.42         |
| AVI                    | 0.72 (0.63-0.81) | 0.001  | 19      | 0.61        | 0.85        | 0.46         |
| HC                     | 0.71 (0.52-0.75) | 0.002  | 100     | 0.65        | 0.65        | 0.30         |
| CUNBAE'                | 0.71 (0.61-0.82) | 0.002  | 27      | 0.63        | 0.80        | 0.43         |
| VAI                    | 0.56 (0.55-0.74) | 0.353  | 9       | 0.65        | 0.58        | 0.23         |
| WHR                    | 0.68 (0.56-0.80) | 0.007  | 0.83    | 0.56        | 0.64        | 0.20         |
| <b>Women</b>           |                  |        |         |             |             |              |
| BMI                    | 0.74 (0.64-0.84) | <0.001 | 24      | 0.68        | 0.78        | 0.46         |
| SATA                   | 0.74 (0.64-0.84) | <0.001 | 227     | 0.68        | 0.78        | 0.46         |
| IMP                    | 0.74 (0.63-0.84) | <0.001 | 103     | 0.68        | 0.78        | 0.46         |
| WHtR                   | 0.67 (0.55-0.77) | 0.013  | 0.53    | 0.59        | 0.78        | 0.37         |
| BRI                    | 0.67 (0.55-0.77) | 0.013  | 4       | 0.59        | 0.78        | 0.37         |
| BAI                    | 0.70 (0.58-0.72) | 0.002  | 29      | 0.79        | 0.60        | 0.39         |
| WC                     | 0.64 (0.53-0.75) | 0.029  | 84      | 0.62        | 0.64        | 0.26         |
| AVI                    | 0.65 (0.54-0.76) | 0.023  | 14      | 0.67        | 0.60        | 0.27         |
| HC                     | 0.69 (0.57-0.80) | 0.004  | 99      | 0.67        | 0.69        | 0.36         |
| CUNBAE'                | 0.73 (0.62-0.83) | <0.001 | 37      | 0.65        | 0.82        | 0.47         |
| VAI                    | 0.65 (0.55-0.74) | 0.023  | 9       | 0.61        | 0.69        | 0.30         |
| WHR                    | 0.56 (0.45-0.67) | 0.353  | 0.92    | 0.67        | 0.70        | 0.37         |

AUC, area under curve; BMI, Body mass index; WC, Waist circumference; HC, Hip circumference; WHtR, waist-to-height ratio; WHR, waist-to-hip ratio; BAI, body adiposity index; VAI, Visceral adiposity index; BRI, body roundness index; AVI, Abdominal Volume Index; CUNBAE', Clinica Universidad de Navarra body adiposity estimator; SATA, Subcutaneous Adipose Tissue Area; IMP, Ideal Mass Percentage.

**Table S4.** AUCs, optimal cut-off, sensitivity, specificity, for the anthropometric indices in ROC analysis for predicting early vascular ageing.

| Anthropometric Indices | AUC (95% CI)     | p     | Cut-off | Sensitivity | Specificity | Youden Index |
|------------------------|------------------|-------|---------|-------------|-------------|--------------|
| <b>Global</b>          |                  |       |         |             |             |              |
| BMI                    | 0.56 (0.50-0.62) | 0.052 | 26      | 0.63        | 0.53        | 0.16         |
| SATA                   | 0.56 (0.50-0.62) | 0.052 | 274     | 0.63        | 0.53        | 0.16         |
| IMP                    | 0.55 (0.49-0.62) | 0.084 | 109     | 0.60        | 0.53        | 0.13         |
| WHtR                   | 0.60 (0.54-0.66) | 0.002 | 0.57    | 0.62        | 0.59        | 0.21         |
| BRI                    | 0.60 (0.54-0.66) | 0.002 | 4.8     | 0.62        | 0.59        | 0.21         |
| BAI                    | 0.51 (0.44-0.57) | 0.883 | 29      | 0.60        | 0.48        | 0.08         |
| WC                     | 0.60 (0.54-0.66) | 0.001 | 91      | 0.68        | 0.52        | 0.20         |
| AVI                    | 0.60 (0.54-0.66) | 0.001 | 17      | 0.68        | 0.50        | 0.18         |
| HC                     | 0.55 (0.49-0.61) | 0.099 | 92      | 0.54        | 0.62        | 0.18         |
| CUNBAE'                | 0.50 (0.44-0.56) | 0.976 | 32      | 0.51        | 0.49        | 0.00         |
| VAI                    | 0.58 (0.52-0.64) | 0.011 | 10      | 0.64        | 0.50        | 0.14         |
| WHR                    | 0.60 (0.54-0.66) | 0.002 | 94      | 0.53        | 0.63        | 0.16         |
| <b>Men</b>             |                  |       |         |             |             |              |
| BMI                    | 0.53 (0.45-0.61) | 0.465 | 26      | 0.62        | 0.46        | 0.08         |
| SATA                   | 0.53 (0.45-0.61) | 0.465 | 275     | 0.62        | 0.46        | 0.08         |
| IMP                    | 0.54 (0.46-0.62) | 0.354 | 108     | 0.63        | 0.51        | 0.14         |
| WHtR                   | 0.59 (0.51-0.67) | 0.035 | 0.58    | 0.61        | 0.58        | 0.20         |
| BRI                    | 0.59 (0.51-0.67) | 0.035 | 4.95    | 0.61        | 0.58        | 0.20         |
| BAI                    | 0.56 (0.48-0.64) | 0.178 | 28      | 0.58        | 0.62        | 0.20         |
| WC                     | 0.58 (0.50-0.66) | 0.052 | 98      | 0.61        | 0.54        | 0.15         |
| AVI                    | 0.58 (0.50-0.66) | 0.062 | 19      | 0.61        | 0.54        | 0.15         |
| HC                     | 0.54 (0.46-0.62) | 0.348 | 102     | 0.61        | 0.54        | 0.15         |
| CUNBAE'                | 0.58 (0.50-0.66) | 0.069 | 28      | 0.60        | 0.56        | 0.16         |
| VAI                    | 0.59 (0.50-0.67) | 0.041 | 13      | 0.56        | 0.60        | 0.16         |
| WHR                    | 0.58 (0.50-0.65) | 0.070 | 0.96    | 0.61        | 0.59        | 0.20         |
| <b>Women</b>           |                  |       |         |             |             |              |
| BMI                    | 0.57 (0.47-0.67) | 0.136 | 26      | 0.60        | 0.62        | 0.22         |
| SATA                   | 0.57 (0.47-0.67) | 0.136 | 278     | 0.60        | 0.62        | 0.22         |
| IMP                    | 0.58 (0.47-0.68) | 0.117 | 113     | 0.60        | 0.60        | 0.20         |
| WHtR                   | 0.58 (0.48-0.68) | 0.092 | 0.57    | 0.58        | 0.64        | 0.22         |
| BRI                    | 0.58 (0.48-0.68) | 0.092 | 4.85    | 0.58        | 0.64        | 0.22         |
| BAI                    | 0.58 (0.47-0.68) | 0.119 | 35      | 0.53        | 0.62        | 0.15         |
| WC                     | 0.57 (0.47-0.67) | 0.132 | 88      | 0.63        | 0.58        | 0.21         |
| AVI                    | 0.57 (0.47-0.67) | 0.136 | 16      | 0.62        | 0.60        | 0.22         |
| HC                     | 0.57 (0.47-0.66) | 0.165 | 102     | 0.60        | 0.51        | 0.11         |
| CUNBAE'                | 0.58 (0.48-0.68) | 0.095 | 39      | 0.63        | 0.54        | 0.17         |
| VAI                    | 0.56 (0.46-0.66) | 0.194 | 11      | 0.56        | 0.60        | 0.16         |
| WHR                    | 0.55 (0.46-0.64) | 0.271 | 0.84    | 0.67        | 0.51        | 0.18         |

AUC, area under curve; BMI, Body mass index; WC, Waist circumference; HC, Hip circumference; WHtR, waist-to-height ratio; WHR, waist-to-hip ratio; BAI, body adiposity index; VAI, Visceral adiposity index; BRI, body roundness index; AVI, Abdominal Volume Index; CUNBAE', Clinica Universidad de Navarra body adiposity estimator; SATA, Subcutaneous Adipose Tissue Area; IMP, Ideal Mass Percentage.
